# Supplementary material for: Designing for Diagnosticity and Serendipity: An Investigation of Social Product-Search Mechanisms
Source: Atypon-hosted journal article supplement (doi:10.1287/isre.2017.0695), 2017-05-01
Supplement: isre.2017.0695-sm.pdf [file isre.2017.0695-sm.pdf]

## Appendix A: A Review of Literature related to Information Foraging Theory (IFT)

| Source                                       | Context                                          | Findings                                                                                                                                                                                                                                        | Relevance to IFT                                                                                                                                                                                       |
|----------------------------------------------|--------------------------------------------------|-------------------------------------------------------------------------------------------------------------------------------------------------------------------------------------------------------------------------------------------------|--------------------------------------------------------------------------------------------------------------------------------------------------------------------------------------------------------|
| Dennis and Taylor (2005)                     | Information search on websites                   | Increased time and effort caused by acceptable web delays provoke increased information search.                                                                                                                                                 | Since response time delays increase the marginal cost to move among pages, foragers will gather more information on each page to maximize benefit-to-cost ratio.                                       |
| Dwairy, Dowell, and Stahl (2011)             | Medical evidence search of general practitioners | General practitioners trade time-consuming evidence-based information sources for sources with a higher information reward per unit search time.                                                                                                | Foragers tend to minimize the time wasted in an unsuccessful patch.                                                                                                                                    |
| Fang, Hu, Chau, et al. (2012)                | Information search on websites                   | Develops three data-driven metrics – power, efficiency, and directness – that consider Web structure, usage, and content data to measure a website’s navigability. Highlights the importance of the efficiency and ease of finding information. | A person moves through different states toward the goal state by choosing the most cost-effective paths and taking advantage of the cues available.                                                    |
| Galletta, Henry, McCoy et al. (2006)         | Information search on websites                   | Website delay, familiarity and breadth all affect users’ search performance, with breadth and familiarity dampening the effects of delay on performance.                                                                                        | Delay raises the cost of navigation and reduces the scent by pushing the target further into the future. Breadth and familiarity reduce the number of required clicks and hence reduce the total cost. |
| Grigoreanu, Burnett, Wiedenbeck et al (2012) | End-user debugging behavior                      | Derives a sensemaking model for end-user debugging behavior. Information foraging is prevalent during end-user debugging.                                                                                                                       | Constructs such as scent can be applied to the design of spreadsheet formulas, layout, and structure to support information foraging by end-user debuggers.                                            |

| Source                                   | Context                                             | Findings                                                                                                                                                                                            | Relevance to IFT                                                                                                                                                                |
|------------------------------------------|-----------------------------------------------------|-----------------------------------------------------------------------------------------------------------------------------------------------------------------------------------------------------|---------------------------------------------------------------------------------------------------------------------------------------------------------------------------------|
| Heer and Agrawala (2008)                 | Collaboration tasks in visual analysis environments | Presents design considerations for asynchronous collaboration in visual analysis environments. Interactive visualization should support social interaction which is key to the sensemaking process. | The first phase of sensemaking is information foraging. Visualizing aggregate foraging behaviors is similar to the scent trails left by ants foraging for food.                 |
| Hoare and Sorensen (2005)                | Information browsing on websites                    | Graphical presentations have an advantage over ranked lists in assisting users with browsing an article collection.                                                                                 | Relationships between elements cannot be determined in a ranked list, hence identifying relevant patches requires high search cost.                                             |
| Katz and Byrne (2003)                    | Information search on websites                      | Information scent influences the decision whether to browse or to search a site.                                                                                                                    | A site with poor information scent results in users anticipating browsing to be a more costly strategy than searching.                                                          |
| Lawrance, Bellamy and Burnett (2007)     | Source code navigation by professional developers   | IFT is a significant predictor of developers' maintenance behavior such as fixing a bug and adding new functionality.                                                                               | Linguistic knowledge and analysis of linguistic relatedness and salience are fundamental to user navigation.                                                                    |
| Lawrance, Bellamy, Burnett et al. (2008) | Source code navigation by professional developers   | Presents a model of programmer navigation during software maintenance, and suggests that source code navigation can be enhanced by highlighting links in class files with high scent.               | Scent can be used to analyze the efficacy of environments, tools, and source code.                                                                                              |
| Lawrance, Bogart, Burnett, et al. (2013) | End-user debugging behavior                         | Constructs of scent and topology provide enough information to describe and predict programmer navigation during debugging.                                                                         | IFT can be mapped to the domain of debugging, with a bug treated as the "prey", words in the environment and source code as "cues", and navigational affordances as "topology". |

| Source                                    | Context                                     | Findings                                                                                                                                                                                                           | Relevance to IFT                                                                                                                                                                                                                                 |
|-------------------------------------------|---------------------------------------------|--------------------------------------------------------------------------------------------------------------------------------------------------------------------------------------------------------------------|--------------------------------------------------------------------------------------------------------------------------------------------------------------------------------------------------------------------------------------------------|
| Lawrance, Burnett, Bellamy, et al. (2010) | End-user debugging behavior                 | Presents a new information foraging model called PFIS2 that models information seeking with potentially evolving goals in the domain of programming debugging.                                                     | Although previous foraging models could in principle change the goal, the goal is an externally specified parameter to the model that does not change as the model runs.                                                                         |
| Liu Mulholland, Song et al. (2010)        | Content-based image retrieval behavior      | Proposes a new user classification model for understanding user interaction with content-based image retrieval.                                                                                                    | The three criteria in the user model, i.e., information goals, search strategies, and evaluation thresholds, can be explained by the three models in IFT, i.e., the scent model, the patch model, and the diet model, respectively.              |
| Moody and Galletta (2015)                 | Information search on websites              | Information scent can reduce the amount of stress that consumers experience when seeking information under time constraints.                                                                                       | Higher information scent indicates the presence of relevant information and reduces effort. When items are more easily found, users will feel less stressed.                                                                                     |
| Mulholland Zdrahal and Collins (2008)     | Exploratory search of online museum content | Two new technologies, exploratory search and semantic web, can support more effective use of online museum content.                                                                                                | Exploratory search reduces the gap between feeding in the current patch and moving to a new patch. Semantic web technologies explicate the informational value of patches, therefore reducing uncertainty and guiding users' navigation choices. |
| Niu, Mahmoud, and Bradshaw (2011)         | Source code navigation                      | Develops a unified code navigation theory, i.e., developers are well adapted to the information in the code space, and they have evolved the strategies to maximize the gains of useful information per unit cost. | People forage for information along patches of resources and decide on what information to consume and what to ignore based on profitability and prevalence of patches.                                                                          |

| Source                                      | Context                                     | Findings                                                                                                                                                                          | Relevance to IFT                                                                                                             |
|---------------------------------------------|---------------------------------------------|-----------------------------------------------------------------------------------------------------------------------------------------------------------------------------------|------------------------------------------------------------------------------------------------------------------------------|
| Olston and Chi (2003)                       | Information browsing and search on websites | Introduces a novel interface that enables users to interpolate smoothly between searching and browsing to locate content more quickly than by either searching or browsing alone. | The new interface assists browsing by adding new supplemental cues tailored to users' needs, which convey appropriate scent. |
| Pan and Fesenmaier (2006)                   | Online tourist search (vacation planning)   | Online tourists tend to use information hubs containing many links to other authoritative websites regarding the designated destinations.                                         | Information foragers tend to look for information in clusters to minimize inter-cluster seeking cost.                        |
| Piorkowski, Fleming, Scaffidi et al. (2012) | Recommender systems design for debugging    | Designs a variety of recommender algorithms to help people look for information while debugging source code.                                                                      | Reactive IFT indicates that a software developer's recent navigation actions can be used to infer the goal.                  |
| White and Drucker (2007)                    | Information search on websites              | There are dramatic differences in variability in the interaction within and between users, and within and between the search queries they submit.                                 | IFT mainly focuses on cognitive simulations of user behavior, but does not fully address behavioral variability.             |

## Appendix B: Screenshot of the profile page (of a socially endorsed individual)

蜡笔小雯子 VIP 发私信

上海

首页 点评(740) 收藏(64)

Home Reviews Collections

关注 75 粉丝 220 鲜花 395

Likes

贡献值: 7550  
社区等级: 六年级  
注册时间: 2006-06-18  
最后登录: 2009-04-30

简介: 爱美食 爱旅游 爱生活

更多个人信息 >

点评

乐堂口私房港式奶茶(定西路店) 5.0

我只想说: 乐堂口的奶茶简直就是失眠利器! 好喝是很好喝的~鸡蛋仔也很酥很香, 其实我还想来个萝卜丝饼, 可惜没有, 哈哈! 奶茶品种很多, 做的很正宗! 每次都会换不同的口味试试~店面小小的, 却是很干净! 三个店员... [全文]

昨天21:57 赞(1) 回应 举报

Like

海天楼中餐厅 4.5

环境不错, 很雅致, 在宾馆二楼, 不拥挤, 餐具也很考究, 文化气息很浓; 服务员都不错, 笑容可掬, 服务态度好, 但上菜速度很慢, 菜品之间间隔时长也很大, 吃完后问及经理, 因为当天有宴会招待, 菜品很棒, 餐前小菜很有味... [全文]

04-28 18:56 赞(6) 回应 举报

捞王捞物料理(吴中店) 5.0

这家捞王之前没吃过, 今天五一过节, 下午就早早订好了位置, 五点半不到做到了, 幸好明智, 到六点半左右基本没位置了, 胡椒猪肚鸡很鲜很鲜, 猪肚很嫩, 小孩子都吃了很多~牛舌也很赞, 这个摆盘我喜欢~他家的午餐肉很... [全文]

03-08 23:51 赞(1) 回应(1) 举报

全部点评(740) >

收藏

onebite一尝 5.0 西式甜点/中山公园

森格格素食料理 4.5 素食/同乐坊

Bumbu | 奔步印尼... 5.0 东南亚菜/南京西路

巧克巧蔻 4.5 饮品/淮海路

全部收藏(64) >

Note: Username and profile pictures are masked to preserve confidentiality.

## Appendix C: Screenshot of a restaurant information page with product tags and socially endorsed people

The screenshot displays the restaurant information page for '巴国布衣 定西路店'. The page is divided into several sections:

- Restaurant name, location, and contact information:** Located at the top left, it provides the restaurant's name, address (上海 长宁区 定西路1018号), and phone number (电话: 021-52397779).
- Tags:** A section below the restaurant info, enclosed in a red box, listing various dishes and their popularity counts. For example, '川菜' (Sichuan Cuisine) has 865 tags, and '口水鸡' (口水鸡) has 144 tags.
- User review:** A section on the left with a red box around the text, showing a user's detailed review of the restaurant's atmosphere and food quality.
- Map:** A map on the right side showing the restaurant's location in Shanghai.
- Socially Endorsed People:** A section on the right with a blue box around the avatars, listing users who have endorsed the restaurant.

Notes:

1. The sections of “restaurant name, location and contact information”, “User review”, and the map were provided for all the four conditions.
2. The section of “Tags” was only provided in the conditions with tags. The number following each tag indicated the number of users who had assigned the tag to the product, i.e., the popularity of this tag for this restaurant.
3. The section of “Socially Endorsed People” was only provided in the conditions with socially endorsed people.

References:

- Dennis, A.R., and N.J. Taylor (2006), "Information foraging on the web: The effects of acceptable Internet delays on multi-page information search behavior," *Decision Support Systems* 42, pp.810-824.
- Dwairy, M., A.C. Dowell, and Jean-Claude Stahl (2011), "The application of foraging theory to the information searching behaviour of general practitioners," *BMC Family Practice*, 12 (90)
- Fang, X., P. J-H Hu, M. Chau, H-F Hu, Z. Yang, and O.R.L. Sheng (2012), "A Data-Driven Approach to Measure Web Site Navigability", *Journal of Management Information Systems*, 29 (2), pp. 173-212.
- Galletta, Dennis F., Raymond M. Henry, Scott McCoy, Peter Polak, (2006) "When the Wait Isn't So Bad: The Interacting Effects of Website Delay, Familiarity, and Breadth." *Information Systems Research* 17(1), pp.20-37.
- Grigoreanu, V., M. Burnett, S. Wiedenbeck, J. Cao, K. Rector, and I. Kwan (2012), "End-User Debugging Strategies: A Sensemaking Perspective," *ACM Transactions on Computer-Human Interaction*, 19 (1), pp. 5-28.
- Heer, J., and M. Agrawala (2008), "Design considerations for collaborative visual analytics," *Information Visualization* 7, pp.49-62.
- Hoare, C. and H. Sorensen (2005), "Information Foraging with a Proximity-Based Browsing Tool," *Artificial Intelligence Review* 24, pp. 233-252.
- Katz, M. A. and M. D. Byrne (2003). "Effects of scent and breadth on use of site-specific search on e-commerce websites." *ACM Transactions on Computer-Human Interaction*, 10(3), pp. 198-220
- Lawrance, J., R. Bellamy and M. Burnett (2007). "Scents in Programs: Does Information Foraging Theory Apply to Program Maintenance?" In proceedings of *IEEE Symposium on Visual Languages and Human-Centric Computing*, Coeur d'Alène, Idaho, USA, 23-27 September.
- Lawrance, J., R. Bellamy, M. Burnett, and K. Rector (2008), "Using Information Scent to Model the Dynamic Foraging Behavior of Programmers in Maintenance Tasks," In proceedings of *the ACM CHI Human Factors in Computing Systems Conference*, April 5-10, Florence, Italy.
- Lawrance, J., C. Bogart, M. Burnett, R. Bellamy, K. Rector, S.D. Fleming (2013), "How Programmers Debug, Revisited: An Information Foraging Theory Perspective," *The IEEE Transactions on Software Engineering*, 39 (2), pp. 197-215.
- Lawrance, J., M. Burnett, R. Bellamy, C. Bogart, and C. Swart (2010), "Reactive Information Foraging for Evolving Goals," In proceedings of *the ACM CHI Human Factors in Computing Systems Conference*, April 10-15, Atlanta, GA, USA.
- Liu, H., P. Mulholland, D. Song, V. Uren and S. Ruger (2010). "Applying Information Foraging Theory to Understand User Interaction with Content-based Image Retrieval" In proceedings of *Information Interaction in Context (III'X)*, New Brunswick, New Jersey, USA, August 18-21
- Moody, G. and Galletta, D.F. (2015) "Lost in Cyberspace: The Impact of Information Scent and Time Constraints on Stress, Performance, and Attitudes," *Journal of Management Information Systems*, 32 (1), pp. 192-224.
- Mulholland, P., Z. Zdrahal, and T. Collins (2008). "Investigating the Effects of Exploratory Semantic Search on the Use of a Museum Archive." *IEEE 2008 International Conference on Distributed Human-Machine Systems*, 10-12 Mar, Athens, Greece.

Niu, N., A. Mahmoud, and G. Bradshaw (2011), "Information foraging as a foundation for code navigation," *the International Conference on Software Engineering (ICSE)*, May 21-28, Waikiki, Honolulu, HI, USA.

Olston, C. and E.H. Chi (2003), "ScentTrails: Integrating Browsing and Searching on the Web," *ACM Transactions on Computer-Human Interaction*, 10 (3), pp. 177-197.

Pan, B. and D.R. Fesenmaier (2006), "Online Information Search: Vacation Planning Process," *Annals of Tourism Research*, 33(3), pp. 809-832.

Piorkowski, D., S.D. Fleming, C. Scaffidi, C. Bogart, M. Burnett, B.E. John, R.K.E. Bellamy, C. Swart (2012), "Reactive Information Foraging: An Empirical Investigation of Theory-Based Recommender Systems for Programmers," In proceedings of *the ACM CHI Human Factors in Computing Systems Conference*, May 5-10, 2012, Austin, Texas, USA.

White, R.W. and S. M. Drucker (2007), "Investigating Behavioral Variability in Web Search," *the International World Wide Web Conference (WWW)*, May 8-12, Banff, Alberta, Canada.
